# Supplementary material for: Cabotegravir and Rilpivirine Long-Acting Antiretroviral Therapy Administered Every 2 Months is Cost-Effective for the Treatment of HIV-1 in Spain
Source: PubMed Central journal article supplement — Infect Dis Ther. 2023 Jul 14;12(8):2039–55. doi: 10.1007/s40121-023-00840-y (PMC10505114; doi:10.1007/s40121-023-00840-y), 2023-07-14
Supplement: 40121_2023_840_MOESM1_ESM.pdf [file 40121_2023_840_MOESM1_ESM.pdf]

**SUPPLEMENTARY MATERIAL FOR:**

**Cabotegravir and Rilpivirine Long-Acting Antiretroviral Therapy Administered Every 2  
Months Is Cost-Effective for the Treatment of HIV-1 in Spain**

Santiago Moreno,<sup>1</sup> Antonio Rivero,<sup>2</sup> Pere Ventayol,<sup>3</sup> Vicenç Falcó,<sup>4</sup> Miguel Torralba,<sup>5</sup> Melanie Schroeder,<sup>6</sup> Victoria Neches,<sup>7</sup> Laura Amanda Vallejo-Aparicio,<sup>7</sup> Isaac Mackenzie,<sup>8</sup> Matthew Turner,<sup>8</sup> Cale Harrison<sup>8</sup>

<sup>1</sup>Hospital Ramón y Cajal, CIBERINFEC, Universidad de Alcalá, IRYCIS, Madrid, Spain;

<sup>2</sup>Hospital Reina Sofía, Córdoba, Spain; <sup>3</sup>Hospital Son Espases, Palma de Mallorca, Spain;

<sup>4</sup>Hospital Vall d'Hebron, Barcelona, Spain; <sup>5</sup>Hospital de Guadalajara, Guadalajara, Spain; <sup>6</sup>ViiV Healthcare, Brentford, UK; <sup>7</sup>GSK, Madrid, Spain; <sup>8</sup>HEOR Ltd, Cardiff, UK

**Correspondence and reprint requests to:**

Victoria Neches

E-mail: victoria.x.neches@gsk.com

**Figure S1.** Treatment switching decision processes.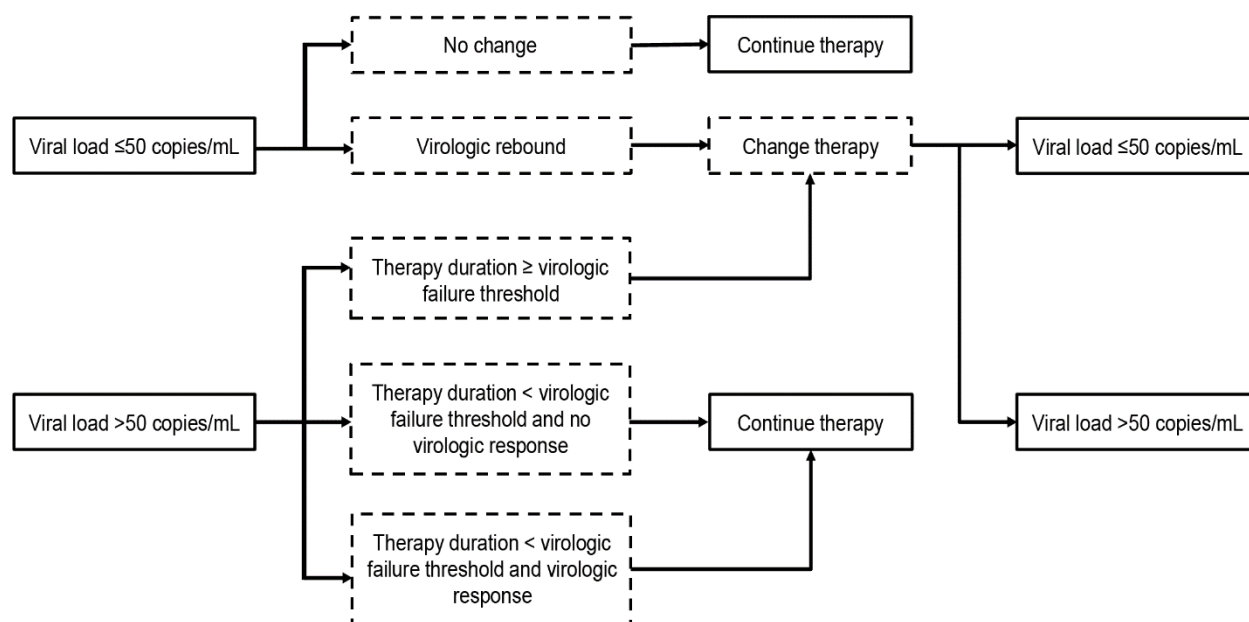

**Figure S2.** Health state utility values from Kauf et al. [1], as applied in the model. HSUV, health state utility value.

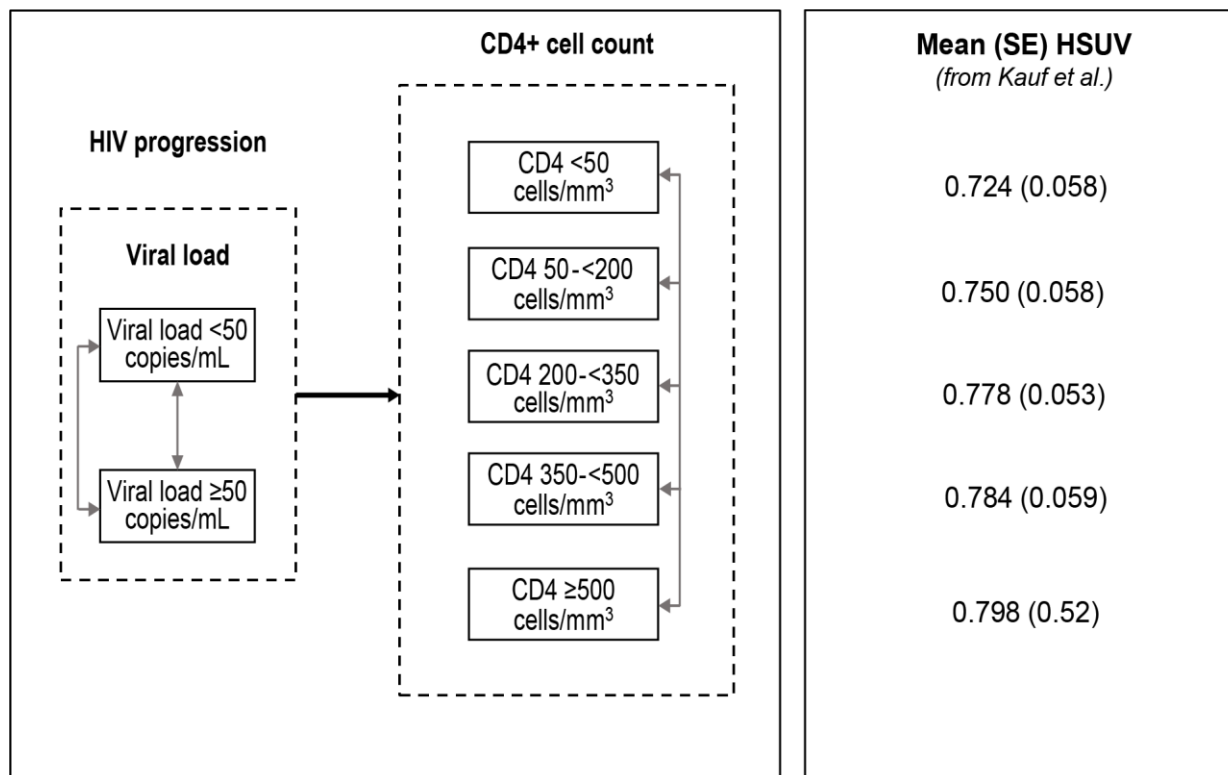

**Table S1.** Probabilities of Virologic and Non-virologic Discontinuations Based on Literature

| Efficacy profile                                       | Source                     | Notes                                                                               | Monthly discontinuation<br>(Weeks 0-48)    |                                                | Monthly discontinuation<br>(Weeks 48-96 and >96) |                                                |
|--------------------------------------------------------|----------------------------|-------------------------------------------------------------------------------------|--------------------------------------------|------------------------------------------------|--------------------------------------------------|------------------------------------------------|
|                                                        |                            |                                                                                     | Virologic<br>discontinuation,<br>mean (SE) | Non-virologic<br>discontinuation,<br>mean (SE) | Virologic<br>discontinuation,<br>mean (SE)       | Non-virologic<br>discontinuation,<br>mean (SE) |
| Treatment-experienced:<br>stable switch                | Baril et al,<br>2016 [2]   | Weighted<br>mean of<br>included<br>studies<br>reporting<br>variable of<br>interest; | 0.0053<br>(0.0003)                         | 0.0079<br>(0.0004)                             | 0.0053<br>(0.0003)                               | 0.0079<br>(0.0004)                             |
| Treatment-experienced:<br>failing switch               | Kanters et al,<br>2017 [3] | same<br>rates assumed<br>for each time<br>period                                    | 0.0165<br>(0.0008)                         | 0.0024<br>(0.0001)                             | 0.0165<br>(0.0008)                               | 0.0024<br>(0.0001)                             |
| CAB+RPV LA<br>Q2M (ATLAS-<br>2M ITC) trial<br>analysis | ATLAS-2M                   | Q2M group of<br>ATLAS-2M                                                            | 0.0016<br>(0.0017)                         | 0.0037<br>(0.0027)                             | 0.0016<br>(0.0017)                               | 0.0037<br>(0.0027)                             |

---

|                                                                           |          |                                                                             |                    |                    |                    |                    |
|---------------------------------------------------------------------------|----------|-----------------------------------------------------------------------------|--------------------|--------------------|--------------------|--------------------|
| cART (ATLAS-2M ITC; equivalent efficacy to CAB+RPV LA Q2M) trial analysis | ATLAS-2M | Q2M group of ATLAS-2M (comparator efficacy assumed equivalent based on ITC) | 0.0016<br>(0.0017) | 0.0037<br>(0.0027) | 0.0016<br>(0.0017) | 0.0037<br>(0.0027) |
|---------------------------------------------------------------------------|----------|-----------------------------------------------------------------------------|--------------------|--------------------|--------------------|--------------------|

---

CAB, cabotegravir; cART, combination antiretroviral therapy; ITC, indirect treatment comparison; LA, long-acting; Q2M, every 2 months; RPV, rilpivirine; SE, standard error.

**Table S2.** AIDS-defining event incidence from the ARAMIS technical report

|                   |                         | Monthly probability of experiencing an AIDS-defining event, mean |                                   |                                    |                                    |                                 |
|-------------------|-------------------------|------------------------------------------------------------------|-----------------------------------|------------------------------------|------------------------------------|---------------------------------|
| Time on treatment | Opportunistic infection | CD4+ <50 cells/mm <sup>3</sup>                                   | CD4+ 50-200 cells/mm <sup>3</sup> | CD4+ 200-350 cells/mm <sup>3</sup> | CD4+ 350-500 cells/mm <sup>3</sup> | CD4+ >500 cells/mm <sup>3</sup> |
| 0-6 months        | Acute viral             | 0.0071                                                           | 0.0033                            | 0.0008                             | 0.0008                             | 0.0008                          |
|                   | Acute bacterial         | 0.0070                                                           | 0.0022                            | 0.0006                             | 0.0004                             | 0.0004                          |
|                   | Acute fungal            | 0.0049                                                           | 0.0022                            | 0.0003                             | 0.0001                             | 0.0001                          |
|                   | Acute protozoal         | 0.0021                                                           | 0.0006                            | 0.0002                             | 0.0001                             | 0.0001                          |
|                   | Other                   | 0.0036                                                           | 0.0020                            | 0.0000                             | 0.0000                             | 0.0000                          |
| 7-12 months       | Acute viral             | 0.0039                                                           | 0.0010                            | 0.0003                             | 0.0003                             | 0.0002                          |
|                   | Acute bacterial         | 0.0027                                                           | 0.0009                            | 0.0001                             | 0.0001                             | 0.0001                          |
|                   | Acute fungal            | 0.0018                                                           | 0.0013                            | 0.0002                             | 0.0002                             | 0.0001                          |
|                   | Acute protozoal         | 0.0018                                                           | 0.0004                            | 0.0001                             | 0.0001                             | 0.0001                          |
|                   | Other                   | 0.0022                                                           | 0.0014                            | 0.0007                             | 0.0003                             | 0.0003                          |
| 13-24 months      | Acute viral             | 0.0019                                                           | 0.0005                            | 0.0002                             | 0.0002                             | 0.0001                          |
|                   | Acute bacterial         | 0.0022                                                           | 0.0008                            | 0.0001                             | 0.0001                             | 0.0001                          |
|                   | Acute fungal            | 0.0016                                                           | 0.0011                            | 0.0002                             | 0.0002                             | 0.0001                          |

|              |                 |        |        |        |        |        |
|--------------|-----------------|--------|--------|--------|--------|--------|
|              | Acute protozoal | 0.0015 | 0.0004 | 0.0001 | 0.0001 | 0.0001 |
|              | Other           | 0.0014 | 0.0009 | 0.0004 | 0.0002 | 0.0002 |
|              | Acute viral     | 0.0005 | 0.0001 | 0.0000 | 0.0000 | 0.0000 |
|              | Acute bacterial | 0.0012 | 0.0004 | 0.0000 | 0.0000 | 0.0000 |
| 25-36 months | Acute fungal    | 0.0015 | 0.0011 | 0.0001 | 0.0001 | 0.0001 |
|              | Acute protozoal | 0.0008 | 0.0002 | 0.0000 | 0.0000 | 0.0000 |
|              | Other           | 0.0009 | 0.0006 | 0.0003 | 0.0001 | 0.0001 |
|              | Acute viral     | 0.0005 | 0.0001 | 0.0000 | 0.0000 | 0.0000 |
|              | Acute bacterial | 0.0012 | 0.0004 | 0.0000 | 0.0000 | 0.0000 |
| >36 months   | Acute fungal    | 0.0015 | 0.0011 | 0.0001 | 0.0001 | 0.0001 |
|              | Acute protozoal | 0.0008 | 0.0002 | 0.0000 | 0.0000 | 0.0000 |
|              | Other           | 0.0009 | 0.0006 | 0.0003 | 0.0001 | 0.0001 |

Standard error assumed to be 10% of mean for all inputs. Lowest value for each time-point CD4+ cell count carried forward.

**Table S3.** Efficacy parameters for available efficacy profiles

| Therapy line                        | Treatment arm               | Source                                      | Virologic suppression at Week 48, Mean (SE), % | Baseline CD4+ cell count, mean (SD) | Change in CD4+ cell count at Week 48, mean (SD) |
|-------------------------------------|-----------------------------|---------------------------------------------|------------------------------------------------|-------------------------------------|-------------------------------------------------|
| Initial modelled line               | CAB+RPV LA                  | Q2M arm from ATLAS-2M                       | 94.3%                                          | 681.8<br>(259.9)                    | 5.3<br>(168.62)                                 |
|                                     | Comparators                 | Assumed equivalent to Q2M arm from ATLAS-2M |                                                |                                     |                                                 |
| Second modelled (Symtuza)           | Stable switch <sup>a</sup>  | Baril (2016) [2]                            | 74.8%<br>(3.7)                                 | 540.0<br>(232.5)                    | 69.3<br>(149.1)                                 |
|                                     | Failing switch <sup>a</sup> | Kanters (2017) [3]                          | 73.8%<br>(3.7)                                 | 168.7<br>(155.1)                    | 176.4<br>(149.3)                                |
| Third modelled line (DTG+Prescobix) | Stable switch <sup>a</sup>  | Baril (2016) [2]                            | 74.8%<br>(3.7)                                 | 540.0<br>(232.5)                    | 69.3<br>(149.1)                                 |
|                                     | Failing switch <sup>a</sup> | Kanters (2017) [3]                          | 73.8%<br>(3.7)                                 | 168.7<br>(155.1)                    | 176.4<br>(149.3)                                |
| Fourth modelled line (Salvage)      | No ART resistance           | Cooper (2008) [4]; Steigbigel (2008) [5]    | 71.0%<br>(7.1)                                 | 151.0<br>(141.0)                    | 119.0<br>(132.7)                                |
|                                     | Resistance to 1 ART class   | Cooper (2008) [4]; Steigbigel (2008) [5]    | 60.6%<br>(6.1)                                 | 151.0<br>(141.0)                    | 111.0<br>(146.3)                                |
|                                     | Resistance to 2 ART classes | Cooper (2008) [4]; Steigbigel (2008) [5]    | 50.8%<br>(5.1)                                 | 151.0<br>(141.0)                    | 71.0<br>(100.8)                                 |

<sup>a</sup>Failing switch refers to people who switched for virologic reasons. Stable switch refers to people who switched for non-virologic reasons



**Table S4.** Probabilistic Sensitivity Analysis Sampling Distributions

| Parameter                                                  | Distribution | Mean  | SE    |
|------------------------------------------------------------|--------------|-------|-------|
| Participant baseline characteristics                       |              |       |       |
| Age, y                                                     | Normal       | 42.7  | 0.489 |
| Female, %                                                  | Beta         | 0.26  | 0.019 |
| Smokers, %                                                 | Beta         | 0.34  | 0.014 |
| Total cholesterol, mg/dL                                   | Normal       | 171.3 | 0.135 |
| HDL cholesterol, mg/dL                                     | Normal       | 49.3  | 0.016 |
| Systolic blood pressure, mmHg                              | Normal       | 121.7 | 0.554 |
| Bone mineral density, g/cm <sup>2</sup>                    | Normal       | 0.96  | 0.021 |
| eGFR, mL/min/1.73m <sup>2</sup>                            | Normal       | 96.1  | 0.746 |
| Distribution of participants across starting health states |              |       |       |
| Viral load ≤50 copies/mL, %                                |              |       |       |
| CD4+ cell count ≤50 cells/mm <sup>3</sup>                  | Beta         | 0     | 0     |
| CD4+ cell count ≤50 cells/mm <sup>3</sup>                  | Beta         | 0     | 0     |
| CD4+ cell count 200-350 cells/mm <sup>3</sup>              | Beta         | 0.067 | 0.011 |
| CD4+ cell count 350-500 cells/mm <sup>3</sup>              | Beta         | 0.184 | 0.017 |
| CD4+ cell count >500 cells/mm <sup>3</sup>                 | Beta         | 0.749 | 0.019 |
| Viral load >50 copies/mL, %                                |              |       |       |
| CD4+ cell count ≤50 cells/mm <sup>3</sup>                  | Beta         | 0     | 0     |
| CD4+ cell count 50-200 cells/mm <sup>3</sup>               | Beta         | 0     | 0     |
| CD4+ cell count 200-350 cells/mm <sup>3</sup>              | Beta         | 0     | 0     |
| CD4+ cell count 350-500 cells/mm <sup>3</sup>              | Beta         | 0     | 0     |
| CD4+ cell count >500 cells/mm <sup>3</sup>                 | Beta         | 0     | 0     |
| Participants with history of diabetes, %                   | —            | 0.194 | 0.006 |
| Utility                                                    |              |       |       |
| CD4+ cell count ≤50 cells/mm <sup>3</sup>                  | Beta         | 0.742 | 0.058 |

|                                               |       |            |          |
|-----------------------------------------------|-------|------------|----------|
| CD4+ cell count 50-200 cells/mm <sup>3</sup>  | Beta  | 0.750      | 0.058    |
| CD4+ cell count 200-350 cells/mm <sup>3</sup> | Beta  | 0.778      | 0.053    |
| CD4+ cell count 350-500 cell/mm <sup>3</sup>  | Beta  | 0.784      | 0.059    |
| CD4+ cell count >500 cells/mm <sup>3</sup>    | Beta  | 0.798      | 0.052    |
| Acute viral OI utility decrement              | Beta  | 0.141      | 0.014    |
| Acute bacterial OI utility decrement          | Beta  | 0.232      | 0.023    |
| Acute fungal OI utility decrement             | Beta  | 0.141      | 0.014    |
| Acute protozoal OI utility decrement          | Beta  | 0.232      | 0.023    |
| Other OI utility decrement                    | Beta  | 0.232      | 0.023    |
| Costs                                         |       |            |          |
| HCRU                                          |       |            |          |
| CD4+ cell count ≤50 cells/mm <sup>3</sup>     | Gamma | €2627.42   | €262.74  |
| CD4+ cell count 50-200 cells/mm <sup>3</sup>  | Gamma | €1020.16   | €102.02  |
| CD4+ cell count 200-350 cells/mm <sup>3</sup> | Gamma | €745.48    | €74.55   |
| CD4+ cell count 350-500 cells/mm <sup>3</sup> | Gamma | €202.28    | €20.23   |
| CD4+ cell count >500 cells/mm <sup>3</sup>    | Gamma | €136.9     | €13.69   |
| Diarrhea                                      | Gamma | €38.74     | €3.87    |
| Injection site reaction, grade 3-4            | Gamma | €102.86    | €10.29   |
| End-of-life cost, last 3 months               | Gamma | €34,489.71 | €3448.97 |

eGFR, estimated glomerular filtration rate; HCRU, healthcare resource utilization; HDL, high-density lipoprotein; OI, opportunistic infection; SE, standard error.

## REFERENCES

1. Kauf TL, Roskell N, Shearer A, et al. A predictive model of health state utilities for HIV patients in the modern era of highly active antiretroviral therapy. *Value Health*. 2008; 11:1144–53.
2. Baril JG, Angel JB, Gill MJ, et al. Dual therapy treatment strategies for the management of patients infected with HIV: a systematic review of current evidence in ARV-naïve or ARV-experienced, virologically suppressed patients. *PLoS One*. 2016; 11:e0148231.
3. Kanters S, Socias ME, Paton NI, et al. Comparative efficacy and safety of second-line antiretroviral therapy for treatment of HIV/AIDS: a systematic review and network meta-analysis. *Lancet HIV*. 2017; 4:e433–441.
4. Cooper DA, Steigbigel RT, Gatell JM, et al. Subgroup and resistance analyses of raltegravir for resistant HIV-1 infection. *N Engl J Med*. 2008; 359:355–65.
5. Steigbigel RT, Cooper DA, Kumar PN, et al. Raltegravir with optimized background therapy for resistant HIV-1 infection. *N Engl J Med*. 2008; 359:339–54.
